# Supplementary material for: Integrative Map of HIF1A Regulatory Elements and Variations
Source: MDPI journal article supplement (doi:10.3390/genes12101526), 2021-09-28
Supplement: s1 [file s1]

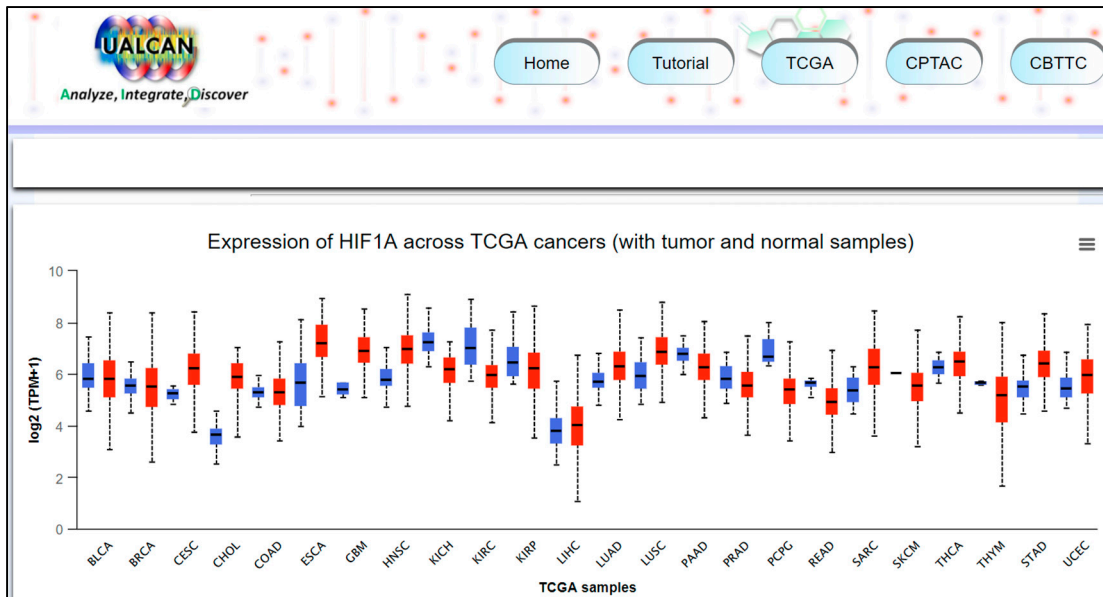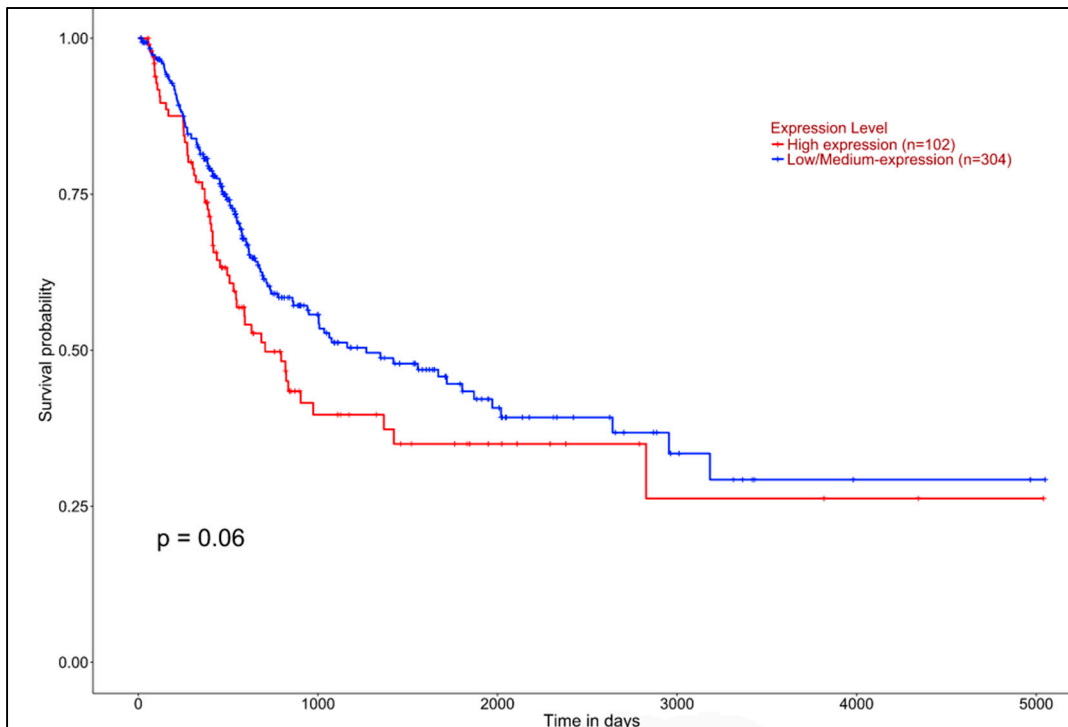

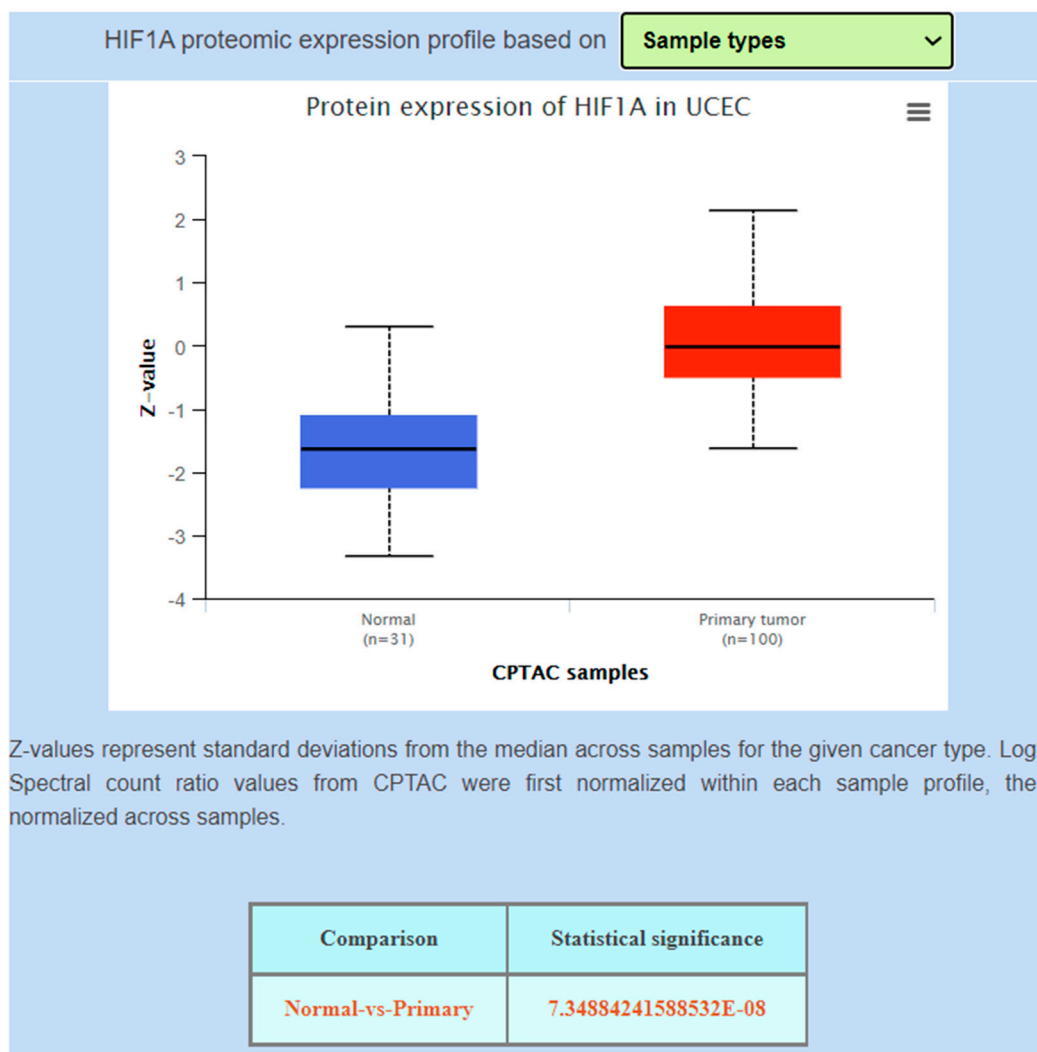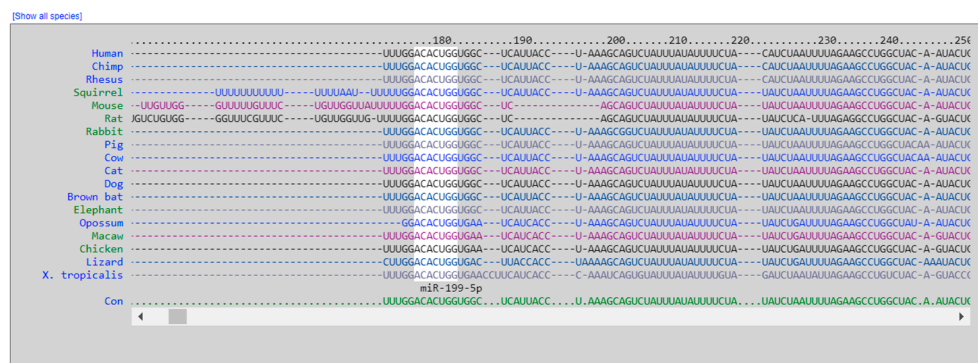

[Download table]

**Conserved**

|                                  | Predicted consequential pairing of target region (top) and miRNA (bottom)   | Site type | Context++ score | Context++ score percentile | Weighted context++ score | Conserved branch length | P <sub>ct</sub> |
|----------------------------------|-----------------------------------------------------------------------------|-----------|-----------------|----------------------------|--------------------------|-------------------------|-----------------|
| Position 177-183 of HIF1A 3' UTR | 5' ...CAUCCUUUUUUUGGACACUGU...<br>hsa-miR-199b-5p 3' CUUGUCUACAGAUUGUGACCC  | 7mer-m8   | -0.22           | 91                         | -0.22                    | 9.367                   | > 0.99          |
| Position 177-183 of HIF1A 3' UTR | 5' ...CAUCCUUUUUUUGGACACUGU...<br>hsa-miR-199a-5p 3' CUUGUCAUCAGACUUGUGACCC | 7mer-m8   | -0.23           | 91                         | -0.23                    | 9.367                   | > 0.99          |

**Figure S1:** *HIF1A* data, extracted from the UALCAN database, an interactive web resource for analyzing cancer OMICS data. **A.** Expression of *HIF1A* across TCGA cancers with tumor and normal samples. **B:** Effect of *HIF1A* expression level on bladder urothelial carcinoma (BLCA) patient survival. **C:** HIF1A proteomic expression profile based on sample types. **D.** Conserved miRNA mir-199-5p target site within the 3' UTR region of the *HIF1A* gene.

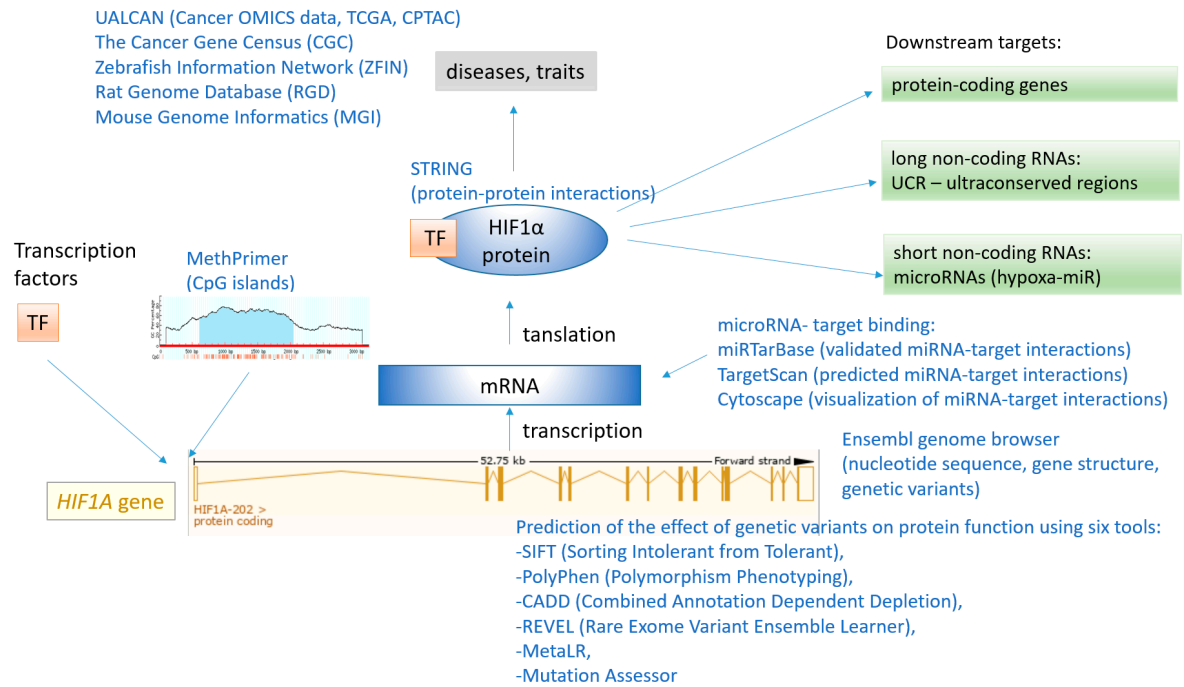

**Figure S2:** Summary of genomic databases and bioinformatics tools used in the present analysis.

**Table S1.** Phenotypes, diseases and traits associated with the *HIF1A* gene in human. Data obtained from the Ensembl genome browser.

|                                         |                    |
|-----------------------------------------|--------------------|
| Acute myeloid leukemia                  | Cancer Gene Census |
| Adrenal Gland Neuroblastoma             | Cancer Gene Census |
| Ampulla of Vater Carcinoma              | Cancer Gene Census |
| Atypical Meningioma                     | Cancer Gene Census |
| Basal cell carcinoma                    | Cancer Gene Census |
| bile duct carcinoma                     | Cancer Gene Census |
| bladder carcinoma                       | Cancer Gene Census |
| brain glioblastoma                      | Cancer Gene Census |
| Breast carcinoma                        | Cancer Gene Census |
| breast ductal adenocarcinoma            | Cancer Gene Census |
| bronchoalveolar adenocarcinoma          | Cancer Gene Census |
| cecum adenocarcinoma                    | Cancer Gene Census |
| Cecum Villous Adenoma                   | Cancer Gene Census |
| cervical squamous cell carcinoma        | Cancer Gene Census |
| Chronic lymphocytic leukemia            | Cancer Gene Census |
| Clear cell renal carcinoma              | Cancer Gene Census |
| colon adenocarcinoma                    | Cancer Gene Census |
| colorectal adenocarcinoma               | Cancer Gene Census |
| Cutaneous melanoma                      | Cancer Gene Census |
| diffuse large B-cell lymphoma           | Cancer Gene Census |
| Endometrial carcinoma                   | Cancer Gene Census |
| Endometrial Endometrioid Adenocarcinoma | Cancer Gene Census |

|                                                                   |                         |
|-------------------------------------------------------------------|-------------------------|
| Esophageal adenocarcinoma                                         | Cancer Gene Census      |
| Esophageal Squamous Cell Carcinoma                                | Cancer Gene Census      |
| gastric adenocarcinoma                                            | Cancer Gene Census      |
| Gastric Adenoma                                                   | Cancer Gene Census      |
| gastric carcinoma                                                 | Cancer Gene Census      |
| head and neck squamous cell carcinoma                             | Cancer Gene Census      |
| Hepatobiliary Neoplasm                                            | Cancer Gene Census      |
| Hepatocellular Carcinoma                                          | Cancer Gene Census      |
| HER2 Positive Breast Carcinoma                                    | Cancer Gene Census      |
| Invasive Breast Carcinoma                                         | Cancer Gene Census      |
| kidney neoplasm                                                   | Cancer Gene Census      |
| Kidney Oncocytoma                                                 | Cancer Gene Census      |
| lobular breast carcinoma                                          | Cancer Gene Census      |
| Lung adenocarcinoma                                               | Cancer Gene Census      |
| Lung carcinoma                                                    | Cancer Gene Census      |
| lymphoid neoplasm                                                 | Cancer Gene Census      |
| mantle cell lymphoma                                              | Cancer Gene Census      |
| Merkel cell skin cancer                                           | Cancer Gene Census      |
| Multiple myeloma                                                  | Cancer Gene Census      |
| nasopharyngeal squamous cell carcinoma                            | Cancer Gene Census      |
| non-functional pancreatic neuroendocrine tumor                    | Cancer Gene Census      |
| non-small cell lung carcinoma                                     | Cancer Gene Census      |
| ovarian endometrioid adenocarcinoma with squamous differentiation | Cancer Gene Census      |
| ovarian serous adenocarcinoma                                     | Cancer Gene Census      |
| pancreatic ductal adenocarcinoma                                  | Cancer Gene Census      |
| pancreatic neuroendocrine tumor                                   | Cancer Gene Census      |
| Papillary renal cell carcinoma                                    | Cancer Gene Census      |
| prostate adenocarcinoma                                           | Cancer Gene Census      |
| prostate carcinoma                                                | Cancer Gene Census      |
| rectal adenocarcinoma                                             | Cancer Gene Census      |
| rectal tubulovillous adenoma                                      | Cancer Gene Census      |
| Rhabdoid Meningioma                                               | Cancer Gene Census      |
| skin carcinoma                                                    | Cancer Gene Census      |
| Small cell lung carcinoma                                         | Cancer Gene Census      |
| soft tissue sarcoma                                               | Cancer Gene Census      |
| squamous cell lung carcinoma                                      | Cancer Gene Census      |
| thyroid carcinoma                                                 | Cancer Gene Census      |
| Thyroid Gland Undifferentiated (Anaplastic) Carcinoma             | Cancer Gene Census      |
| Uterine Carcinosarcoma                                            | Cancer Gene Census      |
| Exercise Test                                                     | <a href="#">dbGaP</a>   |
| Uric Acid                                                         | <a href="#">dbGaP</a>   |
| Malignant tumor of prostate                                       | <a href="#">ClinVar</a> |
| Blood pressure                                                    | <a href="#">dbGaP</a>   |

**Table S2.** Phenotypes, diseases and traits associated with the *HIF1A* gene in animals. Data obtained from the Ensembl genome browser.

| Phenotype, disease and trait      | Source | Species   | Gene               |
|-----------------------------------|--------|-----------|--------------------|
| whole organism, increased amount  | ZFIN   | Zebrafish | ENSDARG00000034293 |
|                                   |        |           | hiflab             |
| whole organism, decreased amount  | ZFIN   | Zebrafish | ENSDARG00000006181 |
|                                   |        |           | hiflaa             |
| whole organism, decreased amount  | ZFIN   | Zebrafish | ENSDARG00000034293 |
|                                   |        |           | hiflab             |
| Werner syndrome                   | RGD    | Rat       | ENSRNOG00000008292 |
|                                   |        |           | Hifla              |
| Varicocele                        | RGD    | Rat       | ENSRNOG00000008292 |
|                                   |        |           | Hifla              |
| Urologic neoplasms                | RGD    | Rat       | ENSRNOG00000008292 |
|                                   |        |           | Hifla              |
| Ulcer                             | RGD    | Rat       | ENSRNOG00000008292 |
|                                   |        |           | Hifla              |
| type 2 diabetes mellitus          | RGD    | Rat       | ENSRNOG00000008292 |
|                                   |        |           | Hifla              |
| transient cerebral ischemia       | RGD    | Rat       | ENSRNOG00000008292 |
|                                   |        |           | Hifla              |
| Thyroid neoplasms                 | RGD    | Rat       | ENSRNOG00000008292 |
|                                   |        |           | Hifla              |
| Testis Reperfusion Injury         | RGD    | Rat       | ENSRNOG00000008292 |
|                                   |        |           | Hifla              |
| Temporomandibular Joint Disorders | RGD    | Rat       | ENSRNOG00000008292 |
|                                   |        |           | Hifla              |
| Subarachnoid Hemorrhage           | RGD    | Rat       | ENSRNOG00000008292 |
|                                   |        |           | Hifla              |
| splanchnocranium, morphology      | ZFIN   | Zebrafish | ENSDARG00000034293 |
|                                   |        |           | hiflab             |
| splanchnocranium, malformed       | ZFIN   | Zebrafish | ENSDARG00000034293 |
|                                   |        |           | hiflab             |
| Spinal Cord Injuries              | RGD    | Rat       | ENSRNOG00000008292 |
|                                   |        |           | Hifla              |
| small second pharyngeal arch      | MGI    | Mouse     | ENSMUSG00000021109 |
|                                   |        |           | Hifla              |
| Skin neoplasms                    | RGD    | Rat       | ENSRNOG00000008292 |
|                                   |        |           | Hifla              |
| skin melanoma                     | RGD    | Rat       | ENSRNOG00000008292 |
|                                   |        |           | Hifla              |
| sclerosing cholangitis            | RGD    | Rat       | ENSRNOG00000008292 |
|                                   |        |           | Hifla              |
| rheumatoid arthritis              | RGD    | Rat       | ENSRNOG00000008292 |
|                                   |        |           | Hifla              |
| Retinal neovascularization        | RGD    | Rat       | ENSRNOG00000008292 |
|                                   |        |           | Hifla              |
| Retinal Ischemia                  | RGD    | Rat       | ENSRNOG00000008292 |

|                                                                            |      |           |                     |
|----------------------------------------------------------------------------|------|-----------|---------------------|
|                                                                            |      |           | Hifl a              |
| retina, increased amount                                                   | ZFIN | Zebrafish | ENS DARG00000034293 |
|                                                                            |      |           | hifl a b            |
| respiratory gaseous exchange by<br>respiratory system, increased frequency | ZFIN | Zebrafish | ENS DARG00000034293 |
|                                                                            |      |           | hifl a b            |
| Reperfusion Injury                                                         | RGD  | Rat       | ENS RNOG00000008292 |
|                                                                            |      |           | Hifl a              |
| renal cell carcinoma                                                       | RGD  | Rat       | ENS RNOG00000008292 |
|                                                                            |      |           | Hifl a              |
| Radiation Injuries, Experimental                                           | RGD  | Rat       | ENS RNOG00000008292 |
|                                                                            |      |           | Hifl a              |
| Radiation Injuries                                                         | RGD  | Rat       | ENS RNOG00000008292 |
|                                                                            |      |           | Hifl a              |
| pulmonary hypertension                                                     | RGD  | Rat       | ENS RNOG00000008292 |
|                                                                            |      |           | Hifl a              |
| psoriasis                                                                  | RGD  | Rat       | ENS RNOG00000008292 |
|                                                                            |      |           | Hifl a              |
| Prostatic neoplasms                                                        | RGD  | Rat       | ENS RNOG00000008292 |
|                                                                            |      |           | Hifl a              |
| prostate cancer                                                            | RGD  | Rat       | ENS RNOG00000008292 |
|                                                                            |      |           | Hifl a              |
| primary biliary cirrhosis                                                  | RGD  | Rat       | ENS RNOG00000008292 |
|                                                                            |      |           | Hifl a              |
| primary biliary cholangitis                                                | RGD  | Rat       | ENS RNOG00000008292 |
|                                                                            |      |           | Hifl a              |
| prenatal lethality, incomplete penetrance                                  | MGI  | Mouse     | ENS MUSG00000021109 |
|                                                                            |      |           | Hifl a              |
| prenatal lethality, complete penetrance                                    | MGI  | Mouse     | ENS MUSG00000021109 |
|                                                                            |      |           | Hifl a              |
| Postmenopausal Osteoporosis                                                | RGD  | Rat       | ENS RNOG00000008292 |
|                                                                            |      |           | Hifl a              |
| polycystic kidney disease                                                  | RGD  | Rat       | ENS RNOG00000008292 |
|                                                                            |      |           | Hifl a              |
| Phyllodes tumor                                                            | RGD  | Rat       | ENS RNOG00000008292 |
|                                                                            |      |           | Hifl a              |
| pharyngeal arch artery hypoplasia                                          | MGI  | Mouse     | ENS MUSG00000021109 |
|                                                                            |      |           | Hifl a              |
| pericardial effusion                                                       | MGI  | Mouse     | ENS MUSG00000021109 |
|                                                                            |      |           | Hifl a              |
| pancreatic cancer                                                          | RGD  | Rat       | ENS RNOG00000008292 |
|                                                                            |      |           | Hifl a              |
| Oxygen-Induced Retinopathy                                                 | RGD  | Rat       | ENS RNOG00000008292 |
|                                                                            |      |           | Hifl a              |
| ovarian cancer                                                             | RGD  | Rat       | ENS RNOG00000008292 |
|                                                                            |      |           | Hifl a              |
| Osteoarthritis                                                             | RGD  | Rat       | ENS RNOG00000008292 |
|                                                                            |      |           | Hifl a              |

|                                                        |      |           |                    |
|--------------------------------------------------------|------|-----------|--------------------|
| optic cup, increased amount                            | ZFIN | Zebrafish | ENSDARG00000034293 |
|                                                        |      |           | hiflab             |
| open neural tube                                       | MGI  | Mouse     | ENSMUSG00000021109 |
|                                                        |      |           | Hifla              |
| olfactory neuroblastoma                                | RGD  | Rat       | ENSRNOG00000008292 |
|                                                        |      |           | Hifla              |
| non-small cell lung carcinoma                          | RGD  | Rat       | ENSRNOG00000008292 |
|                                                        |      |           | Hifla              |
| no abnormal phenotype detected                         | MGI  | Mouse     | ENSMUSG00000021109 |
|                                                        |      |           | Hifla              |
| neural crest cell migration, decreased process quality | ZFIN | Zebrafish | ENSDARG00000034293 |
|                                                        |      |           | hiflab             |
| neural crest cell migration, decreased occurrence      | ZFIN | Zebrafish | ENSDARG00000034293 |
|                                                        |      |           | hiflab             |
| nephroblastoma                                         | RGD  | Rat       | ENSRNOG00000008292 |
|                                                        |      |           | Hifla              |
| Neoplastic Cell Transformation                         | RGD  | Rat       | ENSRNOG00000008292 |
|                                                        |      |           | Hifla              |
| Neoplasm Invasiveness                                  | RGD  | Rat       | ENSRNOG00000008292 |
|                                                        |      |           | Hifla              |
| Myocardial Reperfusion Injury                          | RGD  | Rat       | ENSRNOG00000008292 |
|                                                        |      |           | Hifla              |
| Myocardial Ischemia                                    | RGD  | Rat       | ENSRNOG00000008292 |
|                                                        |      |           | Hifla              |
| Myocardial Infarction                                  | RGD  | Rat       | ENSRNOG00000008292 |
|                                                        |      |           | Hifla              |
| Mycosis Fungoides                                      | RGD  | Rat       | ENSRNOG00000008292 |
|                                                        |      |           | Hifla              |
| motor neuron, part_of, trunk, increased amount         | ZFIN | Zebrafish | ENSDARG00000034293 |
|                                                        |      |           | hiflab             |
| morbid obesity                                         | RGD  | Rat       | ENSRNOG00000008292 |
|                                                        |      |           | Hifla              |
| middle cerebral artery infarction                      | RGD  | Rat       | ENSRNOG00000008292 |
|                                                        |      |           | Hifla              |
| Micronuclei, Chromosome-Defective                      | RGD  | Rat       | ENSRNOG00000008292 |
|                                                        |      |           | Hifla              |
| Memory Disorders                                       | RGD  | Rat       | ENSRNOG00000008292 |
|                                                        |      |           | Hifla              |
| Mammary Neoplasms, Experimental                        | RGD  | Rat       | ENSRNOG00000008292 |
|                                                        |      |           | Hifla              |
| lung non-small cell carcinoma                          | RGD  | Rat       | ENSRNOG00000008292 |
|                                                        |      |           | Hifla              |
| lung disease                                           | RGD  | Rat       | ENSRNOG00000008292 |
|                                                        |      |           | Hifla              |
| Limb Ischemia                                          | RGD  | Rat       | ENSRNOG00000008292 |
|                                                        |      |           | Hifla              |
| Kidney Reperfusion Injury                              | RGD  | Rat       | ENSRNOG00000008292 |

|                                                                                  |      |           |                     |
|----------------------------------------------------------------------------------|------|-----------|---------------------|
|                                                                                  |      |           | Hifl a              |
| kidney failure                                                                   | RGD  | Rat       | ENSRNOG00000008292  |
|                                                                                  |      |           | Hifl a              |
| invasive ductal carcinoma                                                        | RGD  | Rat       | ENSRNOG00000008292  |
|                                                                                  |      |           | Hifl a              |
| Intervertebral Disc Disease                                                      | RGD  | Rat       | ENSRNOG00000008292  |
|                                                                                  |      |           | Hifl a              |
| infarction                                                                       | RGD  | Rat       | ENSRNOG00000008292  |
|                                                                                  |      |           | Hifl a              |
| increased tumor necrosis factor secretion                                        | MGI  | Mouse     | ENSMUSG00000021109  |
|                                                                                  |      |           | Hifl a              |
| increased interferon-gamma secretion                                             | MGI  | Mouse     | ENSMUSG00000021109  |
|                                                                                  |      |           | Hifl a              |
| increased hindbrain size                                                         | MGI  | Mouse     | ENSMUSG00000021109  |
|                                                                                  |      |           | Hifl a              |
| increased embryonic tissue cell apoptosis                                        | MGI  | Mouse     | ENSMUSG00000021109  |
|                                                                                  |      |           | Hifl a              |
| increased apoptosis                                                              | MGI  | Mouse     | ENSMUSG00000021109  |
|                                                                                  |      |           | Hifl a              |
| incomplete somite formation                                                      | MGI  | Mouse     | ENSMUSG00000021109  |
|                                                                                  |      |           | Hifl a              |
| Idiopathic Pulmonary Fibrosis                                                    | RGD  | Rat       | ENSRNOG00000008292  |
|                                                                                  |      |           | Hifl a              |
| Hypoxia-Ischemia, Brain                                                          | RGD  | Rat       | ENSRNOG00000008292  |
|                                                                                  |      |           | Hifl a              |
| hypoxia                                                                          | MGI  | Mouse     | ENSMUSG00000021109  |
|                                                                                  |      |           | Hifl a              |
| hypertension                                                                     | RGD  | Rat       | ENSRNOG00000008292  |
|                                                                                  |      |           | Hifl a              |
| Hyperplasia                                                                      | RGD  | Rat       | ENSRNOG00000008292  |
|                                                                                  |      |           | Hifl a              |
| Hyperalgesia                                                                     | RGD  | Rat       | ENSRNOG00000008292  |
|                                                                                  |      |           | Hifl a              |
| Hot Flashes                                                                      | RGD  | Rat       | ENSRNOG00000008292  |
|                                                                                  |      |           | Hifl a              |
| hepatocellular carcinoma                                                         | RGD  | Rat       | ENSRNOG00000008292  |
|                                                                                  |      |           | Hifl a              |
| Hepatic Encephalopathy                                                           | RGD  | Rat       | ENSRNOG00000008292  |
|                                                                                  |      |           | Hifl a              |
| hemorrhage                                                                       | MGI  | Mouse     | ENSMUSG00000021109  |
|                                                                                  |      |           | Hifl a              |
| hematopoietic stem cell, part_of, ventral wall of dorsal aorta, decreased amount | ZFIN | Zebrafish | ENS DARG00000034293 |
|                                                                                  |      |           | hifl ab             |
| Hemangioblastoma                                                                 | RGD  | Rat       | ENSRNOG00000008292  |
|                                                                                  |      |           | Hifl a              |
| Hearing Loss, Noise-Induced                                                      | RGD  | Rat       | ENSRNOG00000008292  |
|                                                                                  |      |           | Hifl a              |



|                                                                                      |      |           |                    |
|--------------------------------------------------------------------------------------|------|-----------|--------------------|
| head, increased amount                                                               | ZFIN | Zebrafish | ENSDARG00000034293 |
|                                                                                      |      |           | hiflab             |
| goblet cell, part_of, intestine, decreased amount                                    | ZFIN | Zebrafish | ENSDARG00000034293 |
|                                                                                      |      |           | hiflab             |
| glycogen storage disease VII                                                         | RGD  | Rat       | ENSRNOG00000008292 |
|                                                                                      |      |           | Hifla              |
| glycogen storage disease V                                                           | RGD  | Rat       | ENSRNOG00000008292 |
|                                                                                      |      |           | Hifla              |
| glioblastoma multiforme                                                              | RGD  | Rat       | ENSRNOG00000008292 |
|                                                                                      |      |           | Hifla              |
| glioblastoma                                                                         | RGD  | Rat       | ENSRNOG00000008292 |
|                                                                                      |      |           | Hifla              |
| Femur Head Necrosis                                                                  | RGD  | Rat       | ENSRNOG00000008292 |
|                                                                                      |      |           | Hifla              |
| Experimental Neoplasms                                                               | RGD  | Rat       | ENSRNOG00000008292 |
|                                                                                      |      |           | Hifla              |
| Experimental Diabetes Mellitus                                                       | RGD  | Rat       | ENSRNOG00000008292 |
|                                                                                      |      |           | Hifla              |
| Experimental Autoimmune Neuritis                                                     | RGD  | Rat       | ENSRNOG00000008292 |
|                                                                                      |      |           | Hifla              |
| Experimental Arthritis                                                               | RGD  | Rat       | ENSRNOG00000008292 |
|                                                                                      |      |           | Hifla              |
| esophagus squamous cell carcinoma                                                    | RGD  | Rat       | ENSRNOG00000008292 |
|                                                                                      |      |           | Hifla              |
| embryonic lethality during organogenesis, incomplete penetrance                      | MGI  | Mouse     | ENSMUSG00000021109 |
|                                                                                      |      |           | Hifla              |
| embryonic lethality during organogenesis, complete penetrance                        | MGI  | Mouse     | ENSMUSG00000021109 |
|                                                                                      |      |           | Hifla              |
| embryonic lethality between implantation and somite formation, incomplete penetrance | MGI  | Mouse     | ENSMUSG00000021109 |
|                                                                                      |      |           | Hifla              |
| embryonic growth retardation                                                         | MGI  | Mouse     | ENSMUSG00000021109 |
|                                                                                      |      |           | Hifla              |
| embryonic growth arrest                                                              | MGI  | Mouse     | ENSMUSG00000021109 |
|                                                                                      |      |           | Hifla              |
| ductal carcinoma in situ                                                             | RGD  | Rat       | ENSRNOG00000008292 |
|                                                                                      |      |           | Hifla              |
| Ductal Carcinoma                                                                     | RGD  | Rat       | ENSRNOG00000008292 |
|                                                                                      |      |           | Hifla              |
| disorganized yolk sac vascular plexus                                                | MGI  | Mouse     | ENSMUSG00000021109 |
|                                                                                      |      |           | Hifla              |
| disorganized myocardium                                                              | MGI  | Mouse     | ENSMUSG00000021109 |
|                                                                                      |      |           | Hifla              |
| Disease Progression                                                                  | RGD  | Rat       | ENSRNOG00000008292 |
|                                                                                      |      |           | Hifla              |
| dilated dorsal aorta                                                                 | MGI  | Mouse     | ENSMUSG00000021109 |
|                                                                                      |      |           | Hifla              |

|                                                    |      |           |                    |
|----------------------------------------------------|------|-----------|--------------------|
| Diabetic Retinopathy                               | RGD  | Rat       | ENSRNOG00000008292 |
|                                                    |      |           | Hifl a             |
| Diabetic Nephropathies                             | RGD  | Rat       | ENSRNOG00000008292 |
|                                                    |      |           | Hifl a             |
| Diabetes Mellitus, Experimental                    | RGD  | Rat       | ENSRNOG00000008292 |
|                                                    |      |           | Hifl a             |
| Diabetes Complications                             | RGD  | Rat       | ENSRNOG00000008292 |
|                                                    |      |           | Hifl a             |
| decubitus ulcer                                    | RGD  | Rat       | ENSRNOG00000008292 |
|                                                    |      |           | Hifl a             |
| decreased neuron apoptosis                         | MGI  | Mouse     | ENSMUSG00000021109 |
|                                                    |      |           | Hifl a             |
| decreased embryo size                              | MGI  | Mouse     | ENSMUSG00000021109 |
|                                                    |      |           | Hifl a             |
| decreased angiogenesis                             | MGI  | Mouse     | ENSMUSG00000021109 |
|                                                    |      |           | Hifl a             |
| congestive heart failure                           | RGD  | Rat       | ENSRNOG00000008292 |
|                                                    |      |           | Hifl a             |
| congenital heart disease                           | RGD  | Rat       | ENSRNOG00000008292 |
|                                                    |      |           | Hifl a             |
| Colonic Neoplasms                                  | RGD  | Rat       | ENSRNOG00000008292 |
|                                                    |      |           | Hifl a             |
| Chronic Cerebral Hypoperfusion                     | RGD  | Rat       | ENSRNOG00000008292 |
|                                                    |      |           | Hifl a             |
| cholesteatoma of middle ear                        | RGD  | Rat       | ENSRNOG00000008292 |
|                                                    |      |           | Hifl a             |
| Cell Transformation, Neoplastic                    | RGD  | Rat       | ENSRNOG00000008292 |
|                                                    |      |           | Hifl a             |
| cell maturation, occurs_in, goblet cell, disrupted | ZFIN | Zebrafish | ENSDARG00000034293 |
|                                                    |      |           | hifl ab            |
| Cardiomegaly                                       | RGD  | Rat       | ENSRNOG00000008292 |
|                                                    |      |           | Hifl a             |
| cardia bifida                                      | MGI  | Mouse     | ENSMUSG00000021109 |
|                                                    |      |           | Hifl a             |
| Carcinoma                                          | RGD  | Rat       | ENSRNOG00000008292 |
|                                                    |      |           | Hifl a             |
| Burns                                              | RGD  | Rat       | ENSRNOG00000008292 |
|                                                    |      |           | Hifl a             |
| Bronchopulmonary Dysplasia                         | RGD  | Rat       | ENSRNOG00000008292 |
|                                                    |      |           | Hifl a             |
| Breast Neoplasms                                   | RGD  | Rat       | ENSRNOG00000008292 |
|                                                    |      |           | Hifl a             |
| Brain Ischemia                                     | RGD  | Rat       | ENSRNOG00000008292 |
|                                                    |      |           | Hifl a             |
| bladder neck obstruction                           | RGD  | Rat       | ENSRNOG00000008292 |
|                                                    |      |           | Hifl a             |
| axon, part_of, motor neuron, truncated             | ZFIN | Zebrafish | ENSDARG00000034293 |

|                                                                   |      |           |                    |
|-------------------------------------------------------------------|------|-----------|--------------------|
|                                                                   |      |           | hiflab             |
| axon guidance, occurs in, motor neuron, decreased process quality | ZFIN | Zebrafish | ENSDARG00000034293 |
|                                                                   |      |           | hiflab             |
| Atrial Fibrillation                                               | RGD  | Rat       | ENSRNOG00000008292 |
|                                                                   |      |           | Hifla              |
| Astrocytoma                                                       | RGD  | Rat       | ENSRNOG00000008292 |
|                                                                   |      |           | Hifla              |
| asthma                                                            | RGD  | Rat       | ENSRNOG00000008292 |
|                                                                   |      |           | Hifla              |
| Asphyxia                                                          | RGD  | Rat       | ENSRNOG00000008292 |
|                                                                   |      |           | Hifla              |
| Arterial Thrombosis                                               | RGD  | Rat       | ENSRNOG00000008292 |
|                                                                   |      |           | Hifla              |
| Anaplasia                                                         | RGD  | Rat       | ENSRNOG00000008292 |
|                                                                   |      |           | Hifla              |
| Alzheimer's Disease                                               | RGD  | Rat       | ENSRNOG00000008292 |
|                                                                   |      |           | Hifla              |
| Alcoholic Liver Diseases                                          | RGD  | Rat       | ENSRNOG00000008292 |
|                                                                   |      |           | Hifla              |
| Acute-Phase Reaction                                              | RGD  | Rat       | ENSRNOG00000008292 |
|                                                                   |      |           | Hifla              |
| acute kidney failure                                              | RGD  | Rat       | ENSRNOG00000008292 |
|                                                                   |      |           | Hifla              |
| absent third pharyngeal arch                                      | MGI  | Mouse     | ENSMUSG00000021109 |
|                                                                   |      |           | Hifla              |
| absent second pharyngeal arch                                     | MGI  | Mouse     | ENSMUSG00000021109 |
|                                                                   |      |           | Hifla              |
| absent pharyngeal arch arteries                                   | MGI  | Mouse     | ENSMUSG00000021109 |
|                                                                   |      |           | Hifla              |
| absent myocardial trabeculae                                      | MGI  | Mouse     | ENSMUSG00000021109 |
|                                                                   |      |           | Hifla              |
| abnormal vitelline vascular remodeling                            | MGI  | Mouse     | ENSMUSG00000021109 |
|                                                                   |      |           | Hifla              |
| abnormal vascular regression                                      | MGI  | Mouse     | ENSMUSG00000021109 |
|                                                                   |      |           | Hifla              |
| abnormal vascular development                                     | MGI  | Mouse     | ENSMUSG00000021109 |
|                                                                   |      |           | Hifla              |
| abnormal somite development                                       | MGI  | Mouse     | ENSMUSG00000021109 |
|                                                                   |      |           | Hifla              |
| abnormal pharyngeal arch morphology                               | MGI  | Mouse     | ENSMUSG00000021109 |
|                                                                   |      |           | Hifla              |
| abnormal pericardium morphology                                   | MGI  | Mouse     | ENSMUSG00000021109 |
|                                                                   |      |           | Hifla              |
| abnormal pericardial cavity morphology                            | MGI  | Mouse     | ENSMUSG00000021109 |
|                                                                   |      |           | Hifla              |
| abnormal neural fold formation                                    | MGI  | Mouse     | ENSMUSG00000021109 |
|                                                                   |      |           | Hifla              |

|                                            |     |       |                    |
|--------------------------------------------|-----|-------|--------------------|
| abnormal neural crest cell migration       | MGI | Mouse | ENSMUSG00000021109 |
|                                            |     |       | Hifl a             |
| abnormal myocardium layer morphology       | MGI | Mouse | ENSMUSG00000021109 |
|                                            |     |       | Hifl a             |
| abnormal myocardial trabeculae morphology  | MGI | Mouse | ENSMUSG00000021109 |
|                                            |     |       | Hifl a             |
| abnormal metabolism                        | MGI | Mouse | ENSMUSG00000021109 |
|                                            |     |       | Hifl a             |
| abnormal intersomitic vessel morphology    | MGI | Mouse | ENSMUSG00000021109 |
|                                            |     |       | Hifl a             |
| abnormal interleukin secretion             | MGI | Mouse | ENSMUSG00000021109 |
|                                            |     |       | Hifl a             |
| abnormal heart ventricle morphology        | MGI | Mouse | ENSMUSG00000021109 |
|                                            |     |       | Hifl a             |
| abnormal heart tube morphology             | MGI | Mouse | ENSMUSG00000021109 |
|                                            |     |       | Hifl a             |
| abnormal heart looping                     | MGI | Mouse | ENSMUSG00000021109 |
|                                            |     |       | Hifl a             |
| abnormal heart development                 | MGI | Mouse | ENSMUSG00000021109 |
|                                            |     |       | Hifl a             |
| abnormal head mesenchyme morphology        | MGI | Mouse | ENSMUSG00000021109 |
|                                            |     |       | Hifl a             |
| abnormal embryonic epiblast morphology     | MGI | Mouse | ENSMUSG00000021109 |
|                                            |     |       | Hifl a             |
| abnormal embryo development                | MGI | Mouse | ENSMUSG00000021109 |
|                                            |     |       | Hifl a             |
| abnormal dorsal aorta morphology           | MGI | Mouse | ENSMUSG00000021109 |
|                                            |     |       | Hifl a             |
| abnormal developmental patterning          | MGI | Mouse | ENSMUSG00000021109 |
|                                            |     |       | Hifl a             |
| abnormal cytokine level                    | MGI | Mouse | ENSMUSG00000021109 |
|                                            |     |       | Hifl a             |
| abnormal cardiac outflow tract development | MGI | Mouse | ENSMUSG00000021109 |
|                                            |     |       | Hifl a             |
| abnormal blood vessel morphology           | MGI | Mouse | ENSMUSG00000021109 |
|                                            |     |       | Hifl a             |
| abnormal angiogenesis                      | MGI | Mouse | ENSMUSG00000021109 |
